# Supplementary material for: What lies beneath: a retrospective, population-based cohort study investigating clinical and resource-use characteristics of institutionalized older people in Catalonia
Source: PubMed Central journal article supplement (PMC7265641; doi:10.1186/s12877-020-01587-8), 2020-06-02
Supplement: 12877_2020_1587_MOESM1_ESM.pdf [file 12877_2020_1587_MOESM1_ESM.pdf]

# Appendix

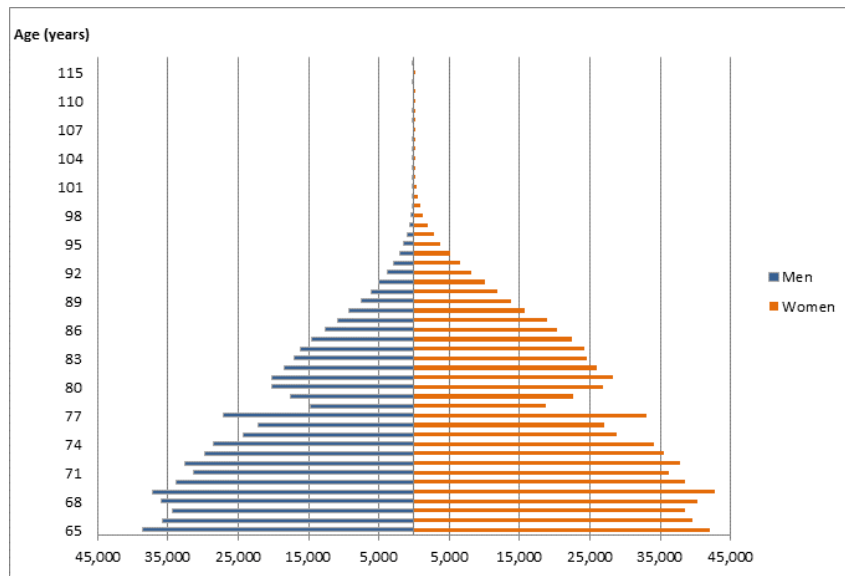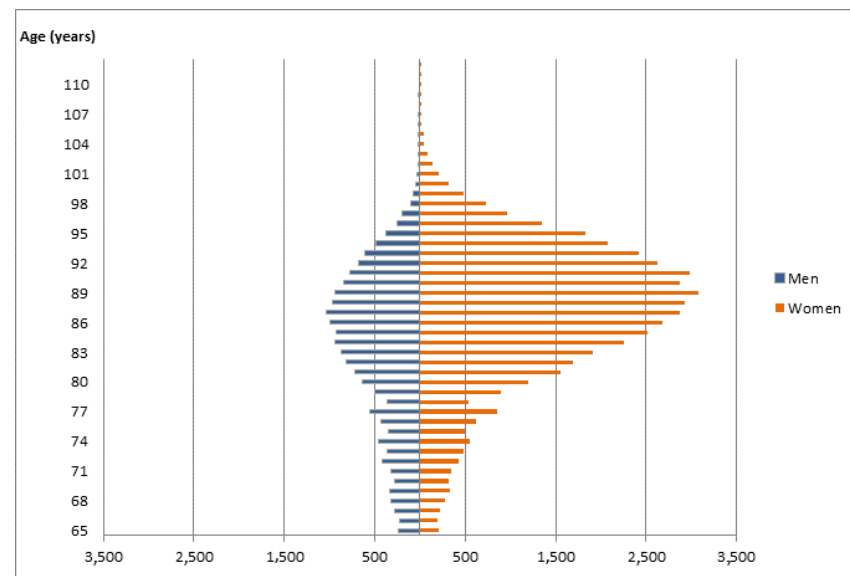

**Fig. A1** Distribution by age and sex of non-IOP (A) and IOP (B), year 2017

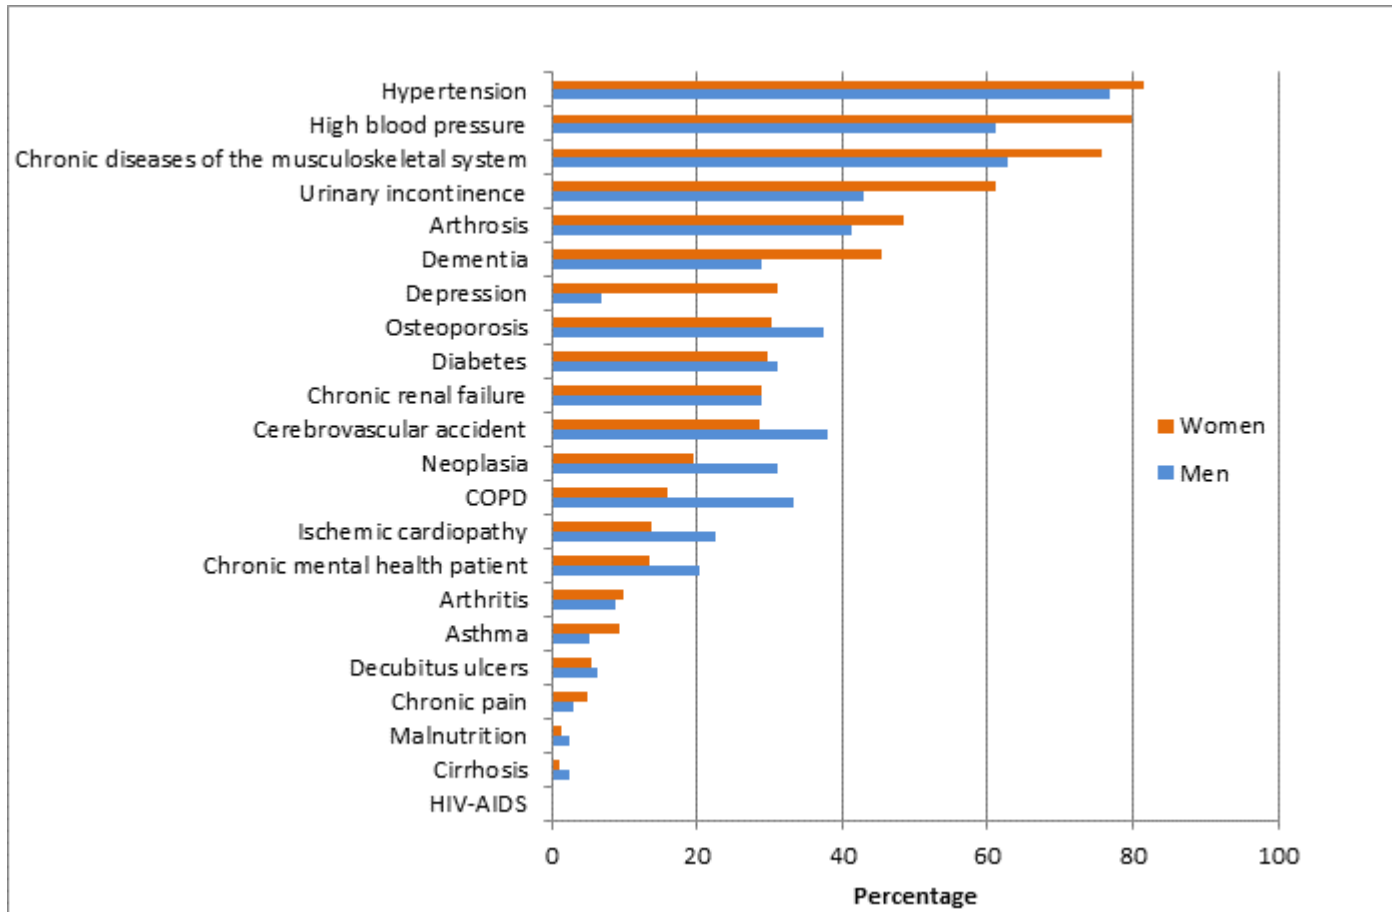

**Figure A2:** Morbidity of institutionalized patients by sex. Year 2017.
